# Supplementary material for: The Impact of the COVID-19 Pandemic on Cancer Mortality in Pennsylvania: A Retrospective Study with Geospatial Analysis
Source: MDPI journal article supplement (doi:10.3390/cancers15194788), 2023-09-29
Supplement: s1 [file s1]

**Supplementary Table S2:** Geographically weighted regression output of three models to identify the impact of county location on the relationship between county-level 2019 rate, sociodemographic factors, and rurality with the county-level 2020 (per 100,000) in Pennsylvania. The regression applies for the 64 counties that provided a 2020 age-adjusted cancer mortality rate. COVID-19 and Cancer Mortality in PA. (Underlying cause of death, Source: CDC WONDER).

| <b>Factor</b>                             | <b>Model 1</b> |               |                |
|-------------------------------------------|----------------|---------------|----------------|
|                                           | <b>Minimum</b> | <b>Median</b> | <b>Maximum</b> |
| Intercept                                 | 76.65          | 101.11        | 127.54         |
| 2019 Age-Adjusted Cancer Mortality Rate   | 0.19           | 0.35          | 0.51           |
| AICc                                      |                | 526.26        |                |
| Global R2                                 |                | 0.26          |                |
| <b>Model 2 (Binary Factor)</b>            |                |               |                |
| Intercept                                 | 151.64         | 154.84        | 157.52         |
| RUCC (0, metro/urban; 1, non-metro/rural) | -3.47          | 2.40          | 4.90           |
| AICc                                      |                | 539.13        |                |
| Global R2                                 |                | 0.11          |                |
| <b>Model 3 (Non-binary Factors)</b>       |                |               |                |
| Intercept                                 | 60.37          | 111.20        | 156.46         |
| 2019 Age-Adjusted Cancer Mortality Rate   | 0.16           | 0.33          | 0.45           |
| Sex (Percent Female)                      | -1.26          | 0.033         | 1.12           |
| Race (Percent Non-White)                  | -0.76          | -0.33         | -0.13          |
| Ethnicity (Percent Hispanic/Latino)       | -0.47          | 0.047         | 0.92           |
| SES                                       | -5.66          | -0.5          | 5.91           |
| AICc                                      |                | 535.83        |                |
| Global R2                                 |                | 0.40          |                |
